# Supplementary material
Source: MDPI journal article supplement (https://www.mdpi.com/2071-1050/10/4/1301)
Supplement: s1 [file s1]

501 **Data presented for the Amazon biome**

502 The Brazilian statistical agency (Portuguese acronym, IBGE) does not report official statistics  
503 for the Amazon biome specifically. In this article, statistics for the biome were calculated by  
504 using municipal datasets (IBGE, 2015): municipalities were classified according to their  
505 dominant biome (i.e. the biome making up a majority of their area) using the extract function  
506 from the *raster* package in [R] (Hijmans et al., 2017). The list of Amazon municipalities used  
507 to calculate biome-wide statistics is available in the online supplementary material  
508 (zuErmgassen\_SOM\_biome.csv, where “GEOCODIG\_M” is the IBGE municipal code,  
509 “UF” is the IBGE state code, “SIGLA” is the two-letter state abbreviation,  
510 “NOME\_MUNIC” is the municipality name, and “biome\_code” is the main biome per  
511 municipality”).

512 **Risks for cattle intensification**

513 As well as impacts on productivity, greenhouse gases, and deforestation, cattle ranching  
514 intensification also has repercussions for animal welfare, nutrient cycling, and farm labor  
515 conditions. For a more detailed description of the risks and potential benefits of cattle  
516 intensification, readers are directed toward (Latawiec et al., 2014).

517 Though high-productivity livestock production can compromise animal welfare, there is  
518 plenty of opportunity for Brazilian cattle production to simultaneously improve productivity  
519 and animal welfare. The productivity increases achieved in the initiatives described in this  
520 review rose in large part because of improved nutrition and animal performance. Rainfall is  
521 strongly seasonal in the Amazon, and in the dry season grass production is greatly reduced.  
522 Without supplementary feeding or active pasture management, cattle gain weight in the wet  
523 season, only to lose much of it in the dry season because of nutritional deficiencies (Silva et

524 al., 2009). As good welfare requires that nutritional and health needs are met (Mellor and  
525 Stafford, 2001), addressing these nutritional deficiencies through improved pasture  
526 management delivers coupled welfare and productivity gains.

527 Not all management changes have the same welfare consequences, however, and improved  
528 nutrition is not sufficient for good welfare. Cattle in agroforestry systems show more  
529 cohesive social behavior and benefit from reduced heat stress as well as improved nutrition  
530 (Broom et al., 2013). For feedlots, the picture is however, more mixed. Feedlots in Brazil are  
531 becoming more common - Mato Grosso's feedlot capacity grew 48% from 2009-2016  
532 (IMEA, 2016) – and while feedlots provide high-energy nutrition that maximize animal  
533 growth rates, careful management is required to ensure adequate welfare. In feedlot systems  
534 heat stress, mud, and welfare during dehorning, castration, and branding are key concerns  
535 (Grandin, 2016), which can be mitigated through training in good agricultural practices, e.g.  
536 training staff to provide analgesia prior to dehorning (Stock et al., 2013). In all systems,  
537 welfare continues beyond the farm-gate, with welfare in transport and slaughter also critical.  
538 While it is therefore encouraging that Embrapa's good agricultural practices and the Brazilian  
539 Roundtable for Sustainable Beef (GTPS) include detailed recommendations on cattle  
540 management and welfare both on and off farm (GTPS, 2016; Valle, 2006), animal welfare  
541 remains an evolving science. As the study of animal welfare increasingly looks beyond the  
542 traditional “five freedoms” – freedom from i) thirst, hunger and malnutrition; ii) discomfort  
543 and exposure; iii) pain, injury, and disease; iv) fear and distress and v) the freedom to express  
544 normal behavior – to look at new measures of welfare, such as “a life worth living” (Mellor,  
545 2016), cattle production systems must ensure that increases in productivity do not come at the  
546 expense of welfare in order to remain acceptable to society today and in future (Broom,  
547 2010).

548 Cattle intensification also faces concerns of increased nutrient run off and water pollution  
549 (Latawiec et al., 2014). This challenge is greatest for feedlot systems, which produce large  
550 volumes of waste in a concentrated area. Most Brazilian production, like the initiatives  
551 described in this review is, however, pasture-based (Strassburg et al., 2014), where urine and  
552 manure are deposited directly onto pasture, rather than stored before disposal. In pasture-  
553 based systems, the effect of this diffuse nutrient pollution can be mitigated by restricting the  
554 access of cattle to streams – riparian areas are in any case protected under the Brazilian forest  
555 code, which requires that landowners reforest 5-100m either side of streams (Soares-Filho et  
556 al., 2014). The do Campo à Mesa, Novo Campo, and Silvopastoral system initiatives  
557 therefore all explicitly require fencing off degraded riparian areas and the installation of  
558 pumps to provide cattle with alternative water sources in pasture areas.

559 This review and many sustainable cattle ranching initiatives have a stronger focus on  
560 agronomic changes than social impacts of intensification (Alice Ferris et al., 2016), though  
561 this does not mean that these initiatives do not consider labor conditions. The do Campo à  
562 Mesa and Novo Campo initiatives, for example, both focus on the implementation of  
563 Embrapa's good agricultural practices (GAP) which includes consideration of the farmer's  
564 social responsibilities and the social function of farming businesses (Valle, 2006). Other  
565 initiatives also have a strong focus on working conditions, as seen in the Pecuária Verde  
566 program in Paragominas (SPRP, 2014). There, workers reported 15% higher wages and  
567 higher work satisfaction than on neighboring farms (da Silva and Barreto, 2014). Though  
568 cattle productivity gains are often delivered through training of farmer workers and increases  
569 in demand for on-farm labor, the implications of different methods of intensification for  
570 labor-markets and rural communities remains understudied.

571 **Additional figures and tables**

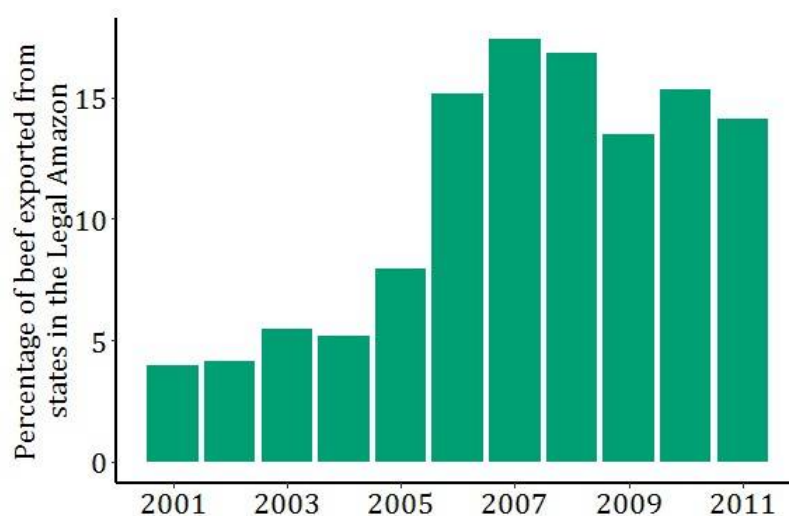

572

573 Figure S1– Exports of beef from the Brazilian Legal Amazon have increased since the early 2000s. Data from: (TRASE,  
574 2017).

575

576 Table S1 – Grass species successfully planted in Acre in mixed pastures with the legumes Tropical kudzu *Pueraria*  
577 *phaseoloides* and Forage peanut *Arachis pintoi*.

| Legume                                      | Complementary grass species                                                                                                                                                                                                                                                                    |
|---------------------------------------------|------------------------------------------------------------------------------------------------------------------------------------------------------------------------------------------------------------------------------------------------------------------------------------------------|
| Tropical kudzu <i>Pueraria phaseoloides</i> | <i>Brachiaria brizantha</i> cultivares (cv.) Marandu, Xaraés<br><i>Brachiaria humidicola</i> cv. comum<br><i>Brachiaria decumbens</i> cv. Basilisk<br><i>Panicum maximum</i> cv. Tanzânia, Mombaça                                                                                             |
| Forage peanut <i>Arachis pintoi</i>         | <i>Brachiaria brizantha</i> cv. Marandu, Xaraés<br><i>Brachiaria humidicola</i> cv. comum<br><i>Brachiaria decumbens</i> cv. Basilisk<br><i>Panicum maximum</i> cv. Tanzânia, Mombaça<br><i>Cynodon nlemfuensis</i> cv. Lua<br><i>Brachiaria arrecta</i> x <i>Brachiaria mutica</i> cv. Laguna |

578

*Supplementary material for zu Ermgassen et al. Results from on-the-ground efforts to promote sustainable cattle ranching in the Brazilian Amazon*

579  
580

*Table S2 – Slaughter ages and weights achieved on intensified farms. . No data were provided from the Florestas de Valor initiative.*

| Name of initiative                                                                                    | Lead organization | Age at slaughter (months)                                               | Weight at slaughter? ( <u>1 liveweight @ = 30kg</u> ) |
|-------------------------------------------------------------------------------------------------------|-------------------|-------------------------------------------------------------------------|-------------------------------------------------------|
| Novo Campo Program                                                                                    | ICV               | Steers: 24 (20-40)<br>Cows: 20 (18-36)                                  | Steers: 21 (18-23)<br>Cows: 13.5 (12-17)              |
| Silvopastoral System with Rotational Grazing for Beef                                                 | Idesam            | 24 (22-34)                                                              | 15 (14-20)                                            |
| Intensification of beef cattle production systems with the use of mixed grass-legume pastures in Acre | Embrapa           | Nelore: 36 (30-42)<br><br>Crossbreed Nelore x Aberdeen Angus 27 (24-30) | 17 (16-20)                                            |
| Do Campo à Mesa                                                                                       | TNC               | ~28                                                                     | 16-18                                                 |

581

*Supplementary material for zu Ermgassen et al. Results from on-the-ground efforts to promote sustainable cattle ranching in the Brazilian Amazon*

*Table S3 – Example breakdown of costs in each initiative.*

| Name of initiative                                                                                    | Breakdown of typical inputs and costs of intensification |              |                  |              |                                                                                                                                                                                         |              |
|-------------------------------------------------------------------------------------------------------|----------------------------------------------------------|--------------|------------------|--------------|-----------------------------------------------------------------------------------------------------------------------------------------------------------------------------------------|--------------|
|                                                                                                       | Pasture liming                                           |              | Fertilizers      |              | Other                                                                                                                                                                                   | Cost (RS/ha) |
|                                                                                                       | Quantity (kg/ha)                                         | Cost (RS/ha) | Quantity (Kg/ha) | Cost (RS/ha) | Examples:                                                                                                                                                                               |              |
| Novo Campo Program                                                                                    | 1500                                                     | 350          | 400              | 850          | Wire, wood (for fencing), machine rental, seeds, plumbing and operational costs.                                                                                                        | 1800         |
| Silvopastoral System with Rotational Grazing for Beef                                                 | 2000-2500                                                | 300-750      | 120-150          | 360-600      | Machine rental for ploughing and application of inputs (e.g. fertilizer), electric fencing, Infrastructure (water pump and in-pasture drinkers), planting of leguminous trees.          | 4600         |
| Intensification of beef cattle production systems with the use of mixed grass-legume pastures in Acre | <600 kg/ha.                                              | 180          | 300              | 600          | Herbicides, machine rental for ploughing and planting of legumes.                                                                                                                       | 450          |
| Do Campo à Mesa                                                                                       | 1500                                                     | 345          | -                | -            | Seeds, fencing, machine rental for pasture restoration.                                                                                                                                 | 1783         |
| Florestas de Valor                                                                                    | 1000                                                     | 367          | 500              | 500          | Wire, wood (for fencing), insulation for electric fence, grass seed, electrified appliance, solar panel, drinking fountains, machine rental for pasture restoration and maize planting. | 1650         |
| Silvopastoral System with Rotational Grazing for Dairy                                                | 2000-2500                                                | 300-750      | 120-200          | 360-600      | Machine rental for ploughing, application of inputs, electric fencing, installation of water system, planting of leguminous tress (seeds and seedlings).                                | 4500         |

*Supplementary material for zu Ermgassen et al. Results from on-the-ground efforts to promote sustainable cattle ranching in the Brazilian Amazon*

Table S4 – Seven other sustainable cattle ranching initiatives in the Amazon biome.

| Name of initiative                                                                              | Number of farms/farm area                                          | Region                         | Reference                         |
|-------------------------------------------------------------------------------------------------|--------------------------------------------------------------------|--------------------------------|-----------------------------------|
| Pecuária Sustentável na Prática                                                                 | 4,547 ha                                                           | Rondônia                       | (GTPS, 2017)                      |
| Projeto Balde Cheio                                                                             | 41 farms in Rondônia, unknown number of farms in Pará and Amazonas | Rondônia, Pará and Amazonas    | (Novo, pers. Comm)                |
| Intensificação na Produção e Proteção a pequenos proprietários e reservas indígenas na Amazônia | 4,000 ha                                                           | Novo Santo Antônio (Piauí)     | (GTPS, 2017)                      |
| Piloto de Pecuária Sustentável no Vale do Araguaia                                              | 140,000 ha                                                         | Vale do Araguaia (Mato Grosso) | (GTPS, 2017)                      |
| Sustainable Agriculture Network                                                                 | 3 farm units                                                       | Juruena (Mato Grosso)          | (Newton et al., 2015)             |
| Terracerta                                                                                      | 2,323,583 ha                                                       | Redenção, Paragominas (Pará)   | (GTPS, 2017)                      |
| Pecuária Verde                                                                                  | 5,207 ha on 6 farms                                                | Paragominas (Pará)             | (SPRP, 2014; D. Silva pers. Comm) |

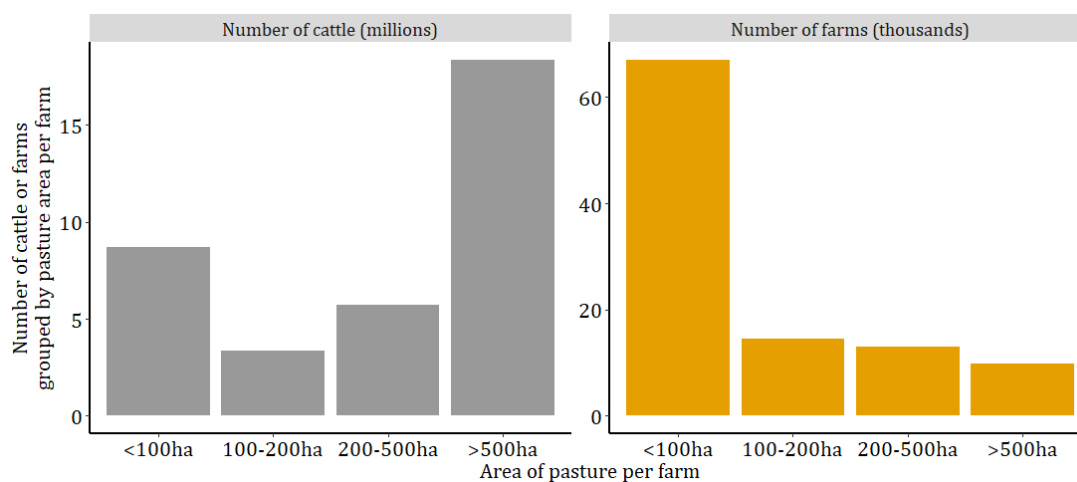

Figure S2 – While half of all cattle (51%) are found on farms of with pasture areas > 500ha (left), these make up only 9.4% of properties (right). Most cattle ranches (78% of properties, rearing 33% of cattle) have pasture areas less than 200 hectares - a size below which some pasture intensification technologies may not be financially viable. Farm size data from: (IBGE, 2006). These data do not include farms with fewer than 50 cattle head, and so probably underestimate the number of small farms.

**References cited:**

- Alice Ferris, V., Galuchi, T., Nery Alves Pinto, H., McDermott, C., 2016. How Brazil's sustainable cattle schemes could beef up to conserve forests and sustainable rural livelihoods.
- Broom, D.M., 2010. Animal Welfare: An Aspect of Care, Sustainability, and Food Quality Required by the Public. *J. Vet. Med. Educ.* 37, 83–88. <https://doi.org/10.3138/jvme.37.1.83>
- Broom, D.M., Galindo, F.A., Murgueitio, E., 2013. Sustainable, efficient livestock production with high biodiversity and good welfare for animals. *Proc. R. Soc. B Biol. Sci.* 280, 20132025–20132025. <https://doi.org/10.1098/rspb.2013.2025>
- da Silva, D.S., Barreto, P., 2014. O aumento da produtividade e lucratividade da pecuária bovina na Amazônia: o caso do Projeto Pecuária Verde em Paragominas. Imazon, Belém, PA.
- Grandin, T., 2016. Evaluation of the welfare of cattle housed in outdoor feedlot pens. *Vet. Anim. Sci.* 1–2, 23–28. <https://doi.org/10.1016/j.vas.2016.11.001>
- GTPS, 2017. Mapa de Iniciativas da Pecuária Sustentável.
- GTPS, 2016. Manual de Práticas para Pecuária Sustentável. Round Table for Sustainable Beef.
- Hijmans, R.J., Etten, J. van, Cheng, J., Mattiuzzi, M., Sumner, M., Greenberg, J.A., Lamigueiro, O.P., Bevan, A., Racine, E.B., Shortridge, A., Ghosh, A., 2017. raster: Geographic Data Analysis and Modeling.
- IBGE, 2015. Pesquisa Pecuária Municipal (PPM) [WWW Document]. URL <https://sidra.ibge.gov.br/pesquisa/ppm/quadros/brasil/2015> (accessed 4.24.17).
- IBGE, 2006. Censo Agropecuário [WWW Document]. URL <http://www2.sidra.ibge.gov.br/bda/acervo/acervo2.asp?e=v&p=CA&z=t&o=24> (accessed 4.21.17).
- IMEA, 2016. 3º Levantamento das intenções de confinamento em 2016. Instituto Mato-Grossense de Economia Agropecuária, Cuiabá, Brazil.
- Latawiec, A.E., Strassburg, B.B.N., Valentim, J.F., Ramos, F., Alves-Pinto, H.N., 2014. Intensification of cattle ranching production systems: socioeconomic and environmental synergies and risks in Brazil. *animal* 8, 1255–1263. <https://doi.org/10.1017/S1751731114001566>
- Mellor, D., 2016. Updating Animal Welfare Thinking: Moving beyond the “Five Freedoms” towards “A Life Worth Living.” *Animals* 6, 21. <https://doi.org/10.3390/ani6030021>



*Supplementary material for zu Ermgassen et al. Results from on-the-ground efforts to promote sustainable cattle ranching in the Brazilian Amazon*

- Mellor, D., Stafford, K., 2001. Integrating practical, regulatory and ethical strategies for enhancing farm animal welfare. *Aust. Vet. J.* 79, 762–768.  
<https://doi.org/10.1111/j.1751-0813.2001.tb10895.x>
- Newton, P., Alves-Pinto, H.N., Pinto, L.F.G., 2015. Certification, Forest Conservation, and Cattle: Theories and Evidence of Change in Brazil: Cattle certification in Brazil. *Conserv. Lett.* 8, 206–213. <https://doi.org/10.1111/conl.12116>
- Silva, F.F. da, SÁ, J.F., Schio, A.R., Ítavo, L.C.V., Silva, R.R., MATEUS, R.G., 2009. Suplementação a pasto: disponibilidade e qualidade x níveis de suplementação x desempenho. *Rev. Bras. Zootec.* 38, 371–389.
- Soares-Filho, B., Rajão, R., Macedo, M., Carneiro, A., Costa, W., Coe, M., Rodrigues, H., Alencar, A., 2014. Cracking Brazil's Forest Code. *Science* 344, 363–364.  
<https://doi.org/10.1126/science.1246663>
- SPRP, 2014. *Pecuária Verde: Produtividade, Legalidade e Bem-estar na Fazenda*. Sindicato dos Produtores Rurais de Paragominas, Paragominas, PA, Brazil.
- Stock, M.L., Baldrige, S.L., Griffin, D., Coetzee, J.F., 2013. Bovine Dehorning Assessing Pain and Providing Analgesic Management. *Vet. Clin. N. Am.-Food Anim. Pract.* 29, 103–+. <https://doi.org/10.1016/j.cvfa.2012.11.001>
- Strassburg, B.B.N., Latawiec, A.E., Barioni, L.G., Nobre, C.A., da Silva, V.P., Valentim, J.F., Vianna, M., Assad, E.D., 2014. When enough should be enough: Improving the use of current agricultural lands could meet production demands and spare natural habitats in Brazil. *Glob. Environ. Change* 28, 84–97.  
<https://doi.org/10.1016/j.gloenvcha.2014.06.001>
- TRASE, 2017. *Transparency for sustainable economies [WWW Document]*. URL <https://trase.earth/> (accessed 4.30.17).
- Valle, E.R. do, 2006. *Boas práticas agropecuárias bovino de corte*. Embrapa Gado de Corte, Campo Grande, MS.
